# Supplementary material
Source: Springer Nature journal article supplement (https://www.springermedizin.de/resource/supplementary/13017_2012_284_MOESM1_ESM.pdf/9635976)
Supplement: MOESM1 [file 9635976]

# PERITONEAL ADHESION INDEX:

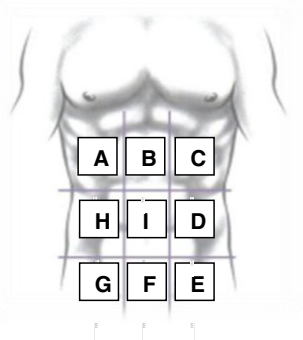

## Regions:

**A** Right upper

\_\_\_

**B** Epigastrium

\_\_\_

**C** Left upper

\_\_\_

**D** Left flank

\_\_\_

**E** Left lower

\_\_\_

**F** Pelvis

\_\_\_

**G** Right lower

\_\_\_

**H** Right flank

\_\_\_

**I** Central

\_\_\_

**L** Bowel to bowel

\_\_\_

## Adhesion grade:

## Adhesion grade score:

**0** No adhesions

**1** Filmy adhesions, blunt dissection

**2** Strong adhesions, sharp dissection

**3** Very strong vascularized adhesions, sharp dissection, damage hardly preventable

**PAI**
